# Supplementary material for: Association between Air Pollution and Suicide in South Korea: A Nationwide Study
Source: PLoS One. 2015 Feb 18;10(2):e0117929. doi: 10.1371/journal.pone.0117929 (PMC4333123; doi:10.1371/journal.pone.0117929)
Supplement: S3 Table — (XLSX) [file pone.0117929.s008.xlsx]

## Sheet: Sheet1
Table S3. Linear regression modeling in 16 regions with 7 different time lags and their meta-analyses
No.	Air Pollution	Weeks prior to suicide	Region	Estimate	S.E	95% CI Lower	95% CI Upper	t value	P
1	Ozone	0	Seoul	121.682	113.478	-100.734	344.098	1.0723	0.284452
2	Ozone	0	Busan	171.25	180.011	-181.571	524.072	0.951333	0.342206
3	Ozone	0	Daegu	263.332	183.987	-97.2835	623.947	1.43125	0.15341
4	Ozone	0	Incheon	258.909	199.682	-132.467	650.285	1.29661	0.195769
5	Ozone	0	Gwangju	321.618	193.645	-57.9276	701.163	1.66086	0.0977938
6	Ozone	0	Deajeon	-467.118	222.632	-903.477	-30.7597	-2.09816	0.0367325
7	Ozone	0	Ulsan	35.2346	310.17	-572.698	643.167	0.113598	0.909633
8	Ozone	0	Kyunggi	122.986	109.999	-92.6125	338.585	1.11806	0.26444
9	Ozone	0	Gangwon	631.099	252.123	136.937	1125.26	2.50314	0.0128449
10	Ozone	0	Chungbuk	828.99	246.606	345.642	1312.34	3.3616	0.000876032
11	Ozone	0	Chungnam	619.964	241.691	146.249	1093.68	2.5651	0.0108039
12	Ozone	0	Jeonbuk	472.546	276.604	-69.5977	1014.69	1.70839	0.0886063
13	Ozone	0	Jeonnam	265.916	210.464	-146.593	678.425	1.26347	0.207406
14	Ozone	0	Gyungbuk	490.372	210.226	78.33	902.414	2.3326	0.0203348
15	Ozone	0	Gyungnam	291.768	196.725	-93.8126	677.349	1.48313	0.139097
16	Ozone	0	Jeju	383.813	250.797	-107.749	875.376	1.53037	0.126989
17	PM-10	0	Seoul	0.0471212	0.0365513	-0.0245193	0.118762	1.28918	0.198335
18	PM-10	0	Busan	0.00960951	0.0577242	-0.10353	0.122749	0.166473	0.867898
19	PM-10	0	Daegu	0.0198838	0.0693411	-0.116025	0.155792	0.286753	0.774502
20	PM-10	0	Incheon	0.0857116	0.072393	-0.0561786	0.227602	1.18398	0.237366
21	PM-10	0	Gwangju	0.137274	0.0731404	-0.00608134	0.280629	1.87685	0.0615151
22	PM-10	0	Deajeon	0.0932272	0.0894668	-0.0821277	0.268582	1.04203	0.298242
23	PM-10	0	Ulsan	0.0397204	0.0877228	-0.132216	0.211657	0.452794	0.651026
24	PM-10	0	Kyunggi	0.0462905	0.0345219	-0.0213724	0.113953	1.3409	0.180973
25	PM-10	0	Gangwon	0.139056	0.0903785	-0.0380859	0.316198	1.5386	0.124964
26	PM-10	0	Chungbuk	0.0566709	0.100603	-0.140511	0.253853	0.563311	0.573647
27	PM-10	0	Chungnam	-0.0227489	0.0856656	-0.190654	0.145156	-0.265554	0.790766
28	PM-10	0	Jeonbuk	0.023014	0.0986099	-0.170261	0.216289	0.233384	0.815623
29	PM-10	0	Jeonnam	0.145392	0.0871123	-0.0253487	0.316132	1.66901	0.0961653
30	PM-10	0	Gyungbuk	0.0695268	0.080227	-0.0877181	0.226772	0.866626	0.386844
31	PM-10	0	Gyungnam	-0.0432303	0.0679721	-0.176456	0.0899949	-0.636001	0.525264
32	PM-10	0	Jeju	-0.066596	0.104685	-0.271779	0.138587	-0.636155	0.525165
33	NO2	0	Seoul	229.071	140.519	-46.3461	504.488	1.63018	0.10412
34	NO2	0	Busan	1059.15	332.098	408.243	1710.07	3.18929	0.00157813
35	NO2	0	Daegu	13.3661	284.335	-543.93	570.662	0.0470085	0.962538
36	NO2	0	Incheon	683.439	278.35	137.873	1229.01	2.45532	0.014647
37	NO2	0	Gwangju	259.085	368.954	-464.066	982.236	0.702215	0.483094
38	NO2	0	Deajeon	-577.286	357.554	-1278.09	123.521	-1.61454	0.107469
39	NO2	0	Ulsan	434.331	425.074	-398.815	1267.48	1.02178	0.307716
40	NO2	0	Kyunggi	33.333	151.115	-262.852	329.518	0.220581	0.82557
41	NO2	0	Gangwon	-494.045	597.113	-1664.39	676.296	-0.82739	0.408678
42	NO2	0	Chungbuk	964.479	465.426	52.2431	1876.71	2.07225	0.0391021
43	NO2	0	Chungnam	21.8648	418.696	-798.78	842.509	0.0522211	0.958387
44	NO2	0	Jeonbuk	145.835	636.344	-1101.4	1393.07	0.229176	0.81889
45	NO2	0	Jeonnam	326.193	495.508	-645.002	1297.39	0.6583	0.510853
46	NO2	0	Gyungbuk	425.659	407.86	-373.746	1225.06	1.04364	0.297498
47	NO2	0	Gyungnam	42.8824	366.811	-676.067	761.832	0.116906	0.907013
48	NO2	0	Jeju	-1905.03	739.221	-3353.9	-456.156	-2.57708	0.0104465
49	CO	0	Seoul	-4.71871	8.14223	-20.6775	11.2401	-0.579535	0.562666
50	CO	0	Busan	-21.0426	21.6559	-63.4881	21.4029	-0.971683	0.331997
51	CO	0	Daegu	1.92631	13.7584	-25.0402	28.8928	0.140009	0.888747
52	CO	0	Incheon	-53.1621	16.0844	-84.6875	-21.6368	-3.3052	0.00106502
53	CO	0	Gwangju	0.704275	13.2403	-25.2467	26.6552	0.0531919	0.957615
54	CO	0	Deajeon	2.65536	14.2417	-25.2585	30.5692	0.186449	0.852219
55	CO	0	Ulsan	-24.85	19.8649	-63.7852	14.0852	-1.25095	0.211933
56	CO	0	Kyunggi	11.8448	8.8706	-5.54158	29.2312	1.33529	0.182802
57	CO	0	Gangwon	17.0114	17.3246	-16.9448	50.9676	0.981921	0.326935
58	CO	0	Chungbuk	-9.11896	14.8374	-38.2002	19.9623	-0.614594	0.539292
59	CO	0	Chungnam	19.034	11.4819	-3.47055	41.5385	1.65774	0.0984227
60	CO	0	Jeonbuk	11.1211	20.1407	-28.3546	50.5968	0.552171	0.581245
61	CO	0	Jeonnam	4.92671	18.3262	-30.9926	40.8461	0.268834	0.788243
62	CO	0	Gyungbuk	0.904101	14.1687	-26.8666	28.6748	0.0638096	0.949165
63	CO	0	Gyungnam	14.4052	18.4375	-21.7324	50.5427	0.781297	0.435248
64	CO	0	Jeju	20.0383	27.3241	-33.5169	73.5934	0.733357	0.463919
65	SO2	0	Seoul	-536.431	634.297	-1779.65	706.791	-0.84571	0.398393
66	SO2	0	Busan	-772.965	858.383	-2455.39	909.465	-0.90049	0.368587
67	SO2	0	Daegu	793.308	998.218	-1163.2	2749.81	0.794724	0.427409
68	SO2	0	Incheon	745.714	1020.5	-1254.47	2745.9	0.730734	0.465516
69	SO2	0	Gwangju	-1318.84	1440.83	-4142.87	1505.19	-0.915331	0.360758
70	SO2	0	Deajeon	-1265.24	1538.87	-4281.42	1750.94	-0.822192	0.411625
71	SO2	0	Ulsan	14.3678	788.162	-1530.43	1559.16	0.0182296	0.985468
72	SO2	0	Kyunggi	-931.311	638.911	-2183.58	320.955	-1.45765	0.145989
73	SO2	0	Gangwon	1386.57	1252.75	-1068.81	3841.96	1.10682	0.269262
74	SO2	0	Chungbuk	16.6849	1064.35	-2069.45	2102.82	0.0156761	0.987503
75	SO2	0	Chungnam	213.929	1428.19	-2585.33	3013.19	0.14979	0.881032
76	SO2	0	Jeonbuk	-867.93	1709.78	-4219.09	2483.23	-0.507628	0.612089
77	SO2	0	Jeonnam	64.272	1039.22	-1972.6	2101.14	0.0618464	0.950727
78	SO2	0	Gyungbuk	-793.482	1094.35	-2938.41	1351.45	-0.725069	0.468979
79	SO2	0	Gyungnam	42.5173	1037.92	-1991.81	2076.84	0.0409639	0.967352
80	SO2	0	Jeju	2100.07	2011.84	-1843.14	6043.29	1.04385	0.297401
81	Ozone	1	Seoul	144.296	106.204	-63.8639	352.455	1.35867	0.17528
82	Ozone	1	Busan	495.503	170.677	160.976	830.029	2.90316	0.00397002
83	Ozone	1	Daegu	93.4933	165.797	-231.468	418.455	0.563904	0.573245
84	Ozone	1	Incheon	125.672	184.478	-235.905	487.249	0.681231	0.496254
85	Ozone	1	Gwangju	311.813	185.18	-51.1397	674.766	1.68384	0.09326
86	Ozone	1	Deajeon	-284.865	212.436	-701.24	131.509	-1.34095	0.180959
87	Ozone	1	Ulsan	514.222	288.175	-50.6007	1079.05	1.78441	0.0753743
88	Ozone	1	Kyunggi	92.3746	105.731	-114.857	299.607	0.87368	0.382996
89	Ozone	1	Gangwon	350.732	244.284	-128.065	829.529	1.43575	0.152121
90	Ozone	1	Chungbuk	594.184	233.194	137.124	1051.24	2.54802	0.0113354
91	Ozone	1	Chungnam	359.027	229.449	-90.6925	808.747	1.56474	0.118706
92	Ozone	1	Jeonbuk	-110.721	256.531	-613.522	392.079	-0.431609	0.666338
93	Ozone	1	Jeonnam	317.05	191.482	-58.2538	692.354	1.65577	0.0988205
94	Ozone	1	Gyungbuk	540.688	189.663	168.949	912.427	2.85079	0.00466551
95	Ozone	1	Gyungnam	331.573	175.037	-11.4991	674.646	1.8943	0.0591526
96	Ozone	1	Jeju	407.633	241.909	-66.5093	881.776	1.68507	0.0930264
97	PM-10	1	Seoul	-0.0144776	0.0360006	-0.0850388	0.0560835	-0.402149	0.687862
98	PM-10	1	Busan	-0.0173156	0.0567058	-0.128459	0.0938278	-0.305359	0.760306
99	PM-10	1	Daegu	0.0363624	0.0679837	-0.0968857	0.16961	0.534869	0.593141
100	PM-10	1	Incheon	0.15132	0.0716589	0.0108689	0.291772	2.11168	0.0355464
101	PM-10	1	Gwangju	0.0289569	0.0721377	-0.112433	0.170347	0.401412	0.688405
102	PM-10	1	Deajeon	0.185299	0.0886246	0.011595	0.359004	2.09083	0.03739
103	PM-10	1	Ulsan	-0.0449498	0.0848681	-0.211291	0.121392	-0.529644	0.596754
104	PM-10	1	Kyunggi	0.034464	0.0343933	-0.0329469	0.101875	1.00205	0.31713
105	PM-10	1	Gangwon	-0.0599268	0.0910416	-0.238368	0.118515	-0.658236	0.510895
106	PM-10	1	Chungbuk	-0.19475	0.0997913	-0.390341	0.000841368	-1.95157	0.0519261
107	PM-10	1	Chungnam	0.00278601	0.0854638	-0.164723	0.170295	0.0325987	0.974016
108	PM-10	1	Jeonbuk	0.17214	0.0962908	-0.0165904	0.360869	1.78771	0.0748396
109	PM-10	1	Jeonnam	0.154979	0.0868758	-0.0152977	0.325255	1.78391	0.0754553
110	PM-10	1	Gyungbuk	-0.0409244	0.0767623	-0.191378	0.10953	-0.533132	0.594339
111	PM-10	1	Gyungnam	0.0223875	0.06601	-0.106992	0.151767	0.339153	0.734734
112	PM-10	1	Jeju	-0.181736	0.10284	-0.383302	0.0198303	-1.76717	0.078226
113	NO2	1	Seoul	144.661	131.515	-113.108	402.43	1.09996	0.272238
114	NO2	1	Busan	573.372	337.982	-89.073	1235.82	1.69646	0.0908437
115	NO2	1	Daegu	358.471	279.553	-189.453	906.394	1.2823	0.200737
116	NO2	1	Incheon	24.0258	271.954	-509.005	557.057	0.088345	0.929662
117	NO2	1	Gwangju	-7.16947	361.332	-715.381	701.042	-0.0198417	0.984183
118	NO2	1	Deajeon	-301.076	345.122	-977.515	375.364	-0.872374	0.383707
119	NO2	1	Ulsan	644.407	425.602	-189.774	1478.59	1.51411	0.131059
120	NO2	1	Kyunggi	130.473	137.394	-138.819	399.764	0.949627	0.343071
121	NO2	1	Gangwon	342.518	598.435	-830.415	1515.45	0.572356	0.567512
122	NO2	1	Chungbuk	946.476	448.8	66.8294	1826.12	2.10891	0.0357868
123	NO2	1	Chungnam	462.176	423.444	-367.774	1292.13	1.09147	0.275948
124	NO2	1	Jeonbuk	242.382	631.362	-995.087	1479.85	0.383903	0.701324
125	NO2	1	Jeonnam	-228.463	495.44	-1199.53	742.599	-0.461132	0.645041
126	NO2	1	Gyungbuk	496.251	411.841	-310.957	1303.46	1.20496	0.229176
127	NO2	1	Gyungnam	-58.1493	364.081	-771.749	655.45	-0.159715	0.873214
128	NO2	1	Jeju	-1276.83	755.277	-2757.17	203.511	-1.69055	0.0919725
129	CO	1	Seoul	9.62851	7.96414	-5.9812	25.2382	1.20898	0.227628
130	CO	1	Busan	-1.15377	21.5382	-43.3686	41.0611	-0.0535688	0.957315
131	CO	1	Daegu	-3.31389	12.9481	-28.6922	22.0645	-0.255935	0.798178
132	CO	1	Incheon	-18.452	15.8684	-49.5541	12.6502	-1.16281	0.245838
133	CO	1	Gwangju	-0.570333	12.8837	-25.8225	24.6818	-0.0442676	0.964721
134	CO	1	Deajeon	-6.30506	13.7141	-33.1847	20.5746	-0.45975	0.646031
135	CO	1	Ulsan	-20.53	19.4141	-58.5816	17.5216	-1.05748	0.291149
136	CO	1	Kyunggi	-7.78516	8.27353	-24.0013	8.43096	-0.940972	0.347481
137	CO	1	Gangwon	12.1278	17.41	-21.9959	46.2515	0.696599	0.486597
138	CO	1	Chungbuk	0.931297	14.3757	-27.2451	29.1077	0.0647826	0.948391
139	CO	1	Chungnam	7.70678	11.5523	-14.9356	30.3492	0.667123	0.505209
140	CO	1	Jeonbuk	-18.1138	19.5939	-56.5178	20.2903	-0.924459	0.355996
141	CO	1	Jeonnam	0.254114	18.1026	-35.2271	35.7353	0.0140374	0.98881
142	CO	1	Gyungbuk	12.9122	13.3334	-13.2213	39.0456	0.968409	0.333625
143	CO	1	Gyungnam	11.0573	18.3035	-24.8175	46.9321	0.604111	0.54623
144	CO	1	Jeju	56.4202	27.0237	3.45368	109.387	2.0878	0.0376676
145	SO2	1	Seoul	-320.455	598.414	-1493.35	852.437	-0.535507	0.592699
146	SO2	1	Busan	-801.763	849.78	-2467.33	863.806	-0.943495	0.346192
147	SO2	1	Daegu	-880.22	953.674	-2749.42	988.982	-0.922978	0.356768
148	SO2	1	Incheon	124.78	963.752	-1764.17	2013.73	0.129473	0.89707
149	SO2	1	Gwangju	901.023	1399.86	-1842.7	3644.75	0.643652	0.520296
150	SO2	1	Deajeon	326.657	1435.42	-2486.77	3140.09	0.227568	0.820138
151	SO2	1	Ulsan	122.136	778.913	-1404.53	1648.81	0.156803	0.875506
152	SO2	1	Kyunggi	412.3	603.614	-770.784	1595.38	0.683052	0.495105
153	SO2	1	Gangwon	2210.76	1190.66	-122.925	4544.45	1.85676	0.0643321
154	SO2	1	Chungbuk	-195.115	1013.88	-2182.33	1792.1	-0.192443	0.847526
155	SO2	1	Chungnam	-544.443	1362.14	-3214.24	2125.36	-0.399696	0.689667
156	SO2	1	Jeonbuk	1836.85	1640.48	-1378.5	5052.19	1.1197	0.263743
157	SO2	1	Jeonnam	-659.585	1016.65	-2652.21	1333.04	-0.648786	0.516977
158	SO2	1	Gyungbuk	-1728.35	1025.24	-3737.83	281.124	-1.6858	0.0928815
159	SO2	1	Gyungnam	268.259	1017.28	-1725.62	2262.14	0.263701	0.792193
160	SO2	1	Jeju	-1476.84	2033.59	-5462.68	2509	-0.726221	0.468275
161	Ozone	2	Seoul	-117.274	109.134	-331.176	96.6278	-1.07459	0.28343
162	Ozone	2	Busan	500.816	162.778	181.771	819.862	3.07668	0.0022883
163	Ozone	2	Daegu	-23.3039	162.363	-341.536	294.928	-0.143529	0.88597
164	Ozone	2	Incheon	274.447	184.257	-86.6964	635.591	1.48948	0.137422
165	Ozone	2	Gwangju	396.727	182.461	39.1035	754.35	2.17431	0.030471
166	Ozone	2	Deajeon	-494.572	211.572	-909.253	-79.8909	-2.33761	0.0200717
167	Ozone	2	Ulsan	80.0333	278.314	-465.462	625.529	0.287565	0.77388
168	Ozone	2	Kyunggi	245.128	107.123	35.1661	455.089	2.28828	0.0228237
169	Ozone	2	Gangwon	326.872	245.464	-154.236	807.981	1.33165	0.183996
170	Ozone	2	Chungbuk	480.773	234.733	20.6953	940.851	2.04817	0.0414228
171	Ozone	2	Chungnam	515.908	221.246	82.2661	949.55	2.33183	0.0203781
172	Ozone	2	Jeonbuk	313.4	253.769	-183.987	810.787	1.23498	0.217813
173	Ozone	2	Jeonnam	184.726	186.26	-180.343	549.795	0.991767	0.322119
174	Ozone	2	Gyungbuk	478.522	183.421	119.016	838.028	2.60887	0.00954401
175	Ozone	2	Gyungnam	150.549	171.072	-184.752	485.849	0.880033	0.379553
176	Ozone	2	Jeju	410.443	236.315	-52.7349	873.621	1.73684	0.0834548
177	PM-10	2	Seoul	0.0198634	0.0358615	-0.0504251	0.0901518	0.553892	0.58007
178	PM-10	2	Busan	0.110256	0.0557571	0.000972504	0.21954	1.97744	0.048916
179	PM-10	2	Daegu	-0.00889449	0.0676079	-0.141406	0.123617	-0.13156	0.895422
180	PM-10	2	Incheon	0.183449	0.0702944	0.0456724	0.321226	2.60973	0.00952058
181	PM-10	2	Gwangju	-0.0289073	0.0702018	-0.166503	0.108688	-0.411774	0.680802
182	PM-10	2	Deajeon	0.283877	0.0867683	0.113811	0.453943	3.27167	0.00119517
183	PM-10	2	Ulsan	-0.0264705	0.0842818	-0.191663	0.138722	-0.314072	0.753687
184	PM-10	2	Kyunggi	0.0346079	0.0336799	-0.0314046	0.10062	1.02756	0.304995
185	PM-10	2	Gangwon	0.0176053	0.0920232	-0.16276	0.197971	0.191313	0.848411
186	PM-10	2	Chungbuk	0.000964019	0.100584	-0.19618	0.198108	0.00958423	0.992359
187	PM-10	2	Chungnam	0.027402	0.0840749	-0.137385	0.192189	0.325923	0.744712
188	PM-10	2	Jeonbuk	0.0438637	0.0968078	-0.14588	0.233607	0.453101	0.650807
189	PM-10	2	Jeonnam	-0.0900357	0.0873456	-0.261233	0.0811618	-1.0308	0.303474
190	PM-10	2	Gyungbuk	-0.016462	0.076691	-0.166776	0.133852	-0.214654	0.830185
191	PM-10	2	Gyungnam	0.0116945	0.0655823	-0.116847	0.140236	0.178317	0.858595
192	PM-10	2	Jeju	0.0551364	0.103053	-0.146848	0.257121	0.535028	0.593032
193	NO2	2	Seoul	130.03	131.767	-128.234	388.293	0.986816	0.324536
194	NO2	2	Busan	12.4705	330.299	-634.916	659.857	0.0377553	0.969908
195	NO2	2	Daegu	436.63	276.019	-104.367	977.628	1.58188	0.114744
196	NO2	2	Incheon	-297.76	259.988	-807.336	211.816	-1.14529	0.253013
197	NO2	2	Gwangju	511.962	362.242	-198.032	1221.96	1.41332	0.15861
198	NO2	2	Deajeon	-293.103	347.379	-973.966	387.759	-0.843757	0.399484
199	NO2	2	Ulsan	1033.24	434.245	182.123	1884.36	2.3794	0.0179723
200	NO2	2	Kyunggi	-124.51	134.624	-388.373	139.353	-0.924874	0.355782
201	NO2	2	Gangwon	158.941	609.237	-1035.16	1353.05	0.260886	0.794361
202	NO2	2	Chungbuk	-189.425	464.01	-1098.88	720.034	-0.408235	0.683395
203	NO2	2	Chungnam	623.346	418.407	-196.732	1443.42	1.48981	0.137336
204	NO2	2	Jeonbuk	-27.7573	636.901	-1276.08	1220.57	-0.0435818	0.965267
205	NO2	2	Jeonnam	-164.817	500.962	-1146.7	817.067	-0.329002	0.742386
206	NO2	2	Gyungbuk	364.169	414.612	-448.471	1176.81	0.878337	0.380471
207	NO2	2	Gyungnam	108.363	363.238	-603.584	820.309	0.298325	0.765664
208	NO2	2	Jeju	-321.286	747.851	-1787.07	1144.5	-0.429612	0.66779
209	CO	2	Seoul	-4.88492	7.98818	-20.5417	10.7719	-0.611519	0.541324
210	CO	2	Busan	5.10591	21.0614	-36.1744	46.3862	0.24243	0.808614
211	CO	2	Daegu	-23.3188	12.8611	-48.5267	1.88901	-1.81312	0.0708258
212	CO	2	Incheon	-3.95721	15.1224	-33.597	25.6826	-0.26168	0.79375
213	CO	2	Gwangju	-18.8553	12.7297	-43.8056	6.09491	-1.48121	0.139612
214	CO	2	Deajeon	-4.74514	13.2448	-30.705	21.2148	-0.358263	0.720401
215	CO	2	Ulsan	-15.7833	19.1919	-53.3994	21.8328	-0.822394	0.411513
216	CO	2	Kyunggi	8.08362	8.03049	-7.65614	23.8234	1.00662	0.314939
217	CO	2	Gangwon	-10.5778	17.2493	-44.3864	23.2308	-0.61323	0.540194
218	CO	2	Chungbuk	5.59389	14.315	-22.4636	33.6514	0.39077	0.696247
219	CO	2	Chungnam	4.86335	11.4604	-17.5991	27.3258	0.424361	0.67161
220	CO	2	Jeonbuk	-4.82706	19.7369	-43.5113	33.8572	-0.244571	0.806957
221	CO	2	Jeonnam	-6.6159	18.1233	-42.1376	28.9058	-0.365049	0.715335
222	CO	2	Gyungbuk	0.727004	13.2968	-25.3346	26.7887	0.0546753	0.956434
223	CO	2	Gyungnam	1.02943	18.1577	-34.5597	36.6186	0.0566938	0.954827
224	CO	2	Jeju	37.2787	27.1595	-15.9538	90.5113	1.37259	0.17092
225	SO2	2	Seoul	241.857	599.019	-932.22	1415.93	0.403755	0.686684
226	SO2	2	Busan	-429.07	862.185	-2118.95	1260.81	-0.497654	0.619096
227	SO2	2	Daegu	981.264	935.931	-853.161	2815.69	1.04844	0.295293
228	SO2	2	Incheon	-229.299	952.156	-2095.52	1636.93	-0.240821	0.80986
229	SO2	2	Gwangju	1842.22	1348.84	-801.511	4485.95	1.36578	0.173042
230	SO2	2	Deajeon	-245.747	1405.23	-2999.99	2508.5	-0.174881	0.861293
231	SO2	2	Ulsan	-230.504	820.665	-1839.01	1378	-0.280875	0.779002
232	SO2	2	Kyunggi	14.039	596.788	-1155.66	1183.74	0.0235243	0.981248
233	SO2	2	Gangwon	1864.9	1204.47	-495.867	4225.66	1.54831	0.122612
234	SO2	2	Chungbuk	-45.4542	1018.13	-2041	1950.09	-0.0446446	0.964421
235	SO2	2	Chungnam	-697.966	1324.41	-3293.81	1897.88	-0.527001	0.598586
236	SO2	2	Jeonbuk	1521.56	1654.52	-1721.31	4764.42	0.919636	0.358509
237	SO2	2	Jeonnam	187.086	1014.31	-1800.96	2175.13	0.184447	0.853789
238	SO2	2	Gyungbuk	-1162.45	1019.73	-3161.13	836.227	-1.13996	0.255223
239	SO2	2	Gyungnam	638.861	1029.49	-1378.94	2656.66	0.620562	0.535364
240	SO2	2	Jeju	-639.932	2053.92	-4665.62	3385.76	-0.311566	0.75559
241	Ozone	3	Seoul	30.3587	108.082	-181.483	242.2	0.280884	0.778995
242	Ozone	3	Busan	617.96	157.894	308.488	927.433	3.91377	0.000112805
243	Ozone	3	Daegu	116.758	163.679	-204.052	437.568	0.71334	0.4762
244	Ozone	3	Incheon	-53.9609	185.461	-417.464	309.542	-0.290956	0.771289
245	Ozone	3	Gwangju	314.837	183.85	-45.5084	675.183	1.71247	0.0878574
246	Ozone	3	Deajeon	-157.054	216.32	-581.042	266.934	-0.726026	0.468396
247	Ozone	3	Ulsan	-128.174	275.675	-668.497	412.149	-0.464947	0.642312
248	Ozone	3	Kyunggi	150.989	108.324	-61.3269	363.304	1.39386	0.164406
249	Ozone	3	Gangwon	545.142	244.27	66.3723	1023.91	2.23172	0.0263821
250	Ozone	3	Chungbuk	263.341	232.879	-193.101	719.783	1.13081	0.259052
251	Ozone	3	Chungnam	518.061	216.29	94.1334	941.989	2.39522	0.0172318
252	Ozone	3	Jeonbuk	109.36	250.434	-381.491	600.211	0.436683	0.662659
253	Ozone	3	Jeonnam	172.659	181.224	-182.539	527.858	0.952742	0.341498
254	Ozone	3	Gyungbuk	278.665	180.312	-74.7479	632.077	1.54545	0.123305
255	Ozone	3	Gyungnam	411.535	163.456	91.1611	731.909	2.51771	0.0123398
256	Ozone	3	Jeju	275.853	232.529	-179.904	731.609	1.18632	0.236452
257	PM-10	3	Seoul	0.0880163	0.0351697	0.0190838	0.156949	2.50262	0.0128668
258	PM-10	3	Busan	0.0413238	0.0559307	-0.0683003	0.150948	0.73884	0.460589
259	PM-10	3	Daegu	0.0247844	0.0677714	-0.108048	0.157616	0.365705	0.714847
260	PM-10	3	Incheon	0.0843396	0.0711413	-0.0550973	0.223777	1.18552	0.236762
261	PM-10	3	Gwangju	0.0497181	0.0703441	-0.0881563	0.187592	0.706784	0.480257
262	PM-10	3	Deajeon	0.0514299	0.0886223	-0.12227	0.22513	0.580327	0.562135
263	PM-10	3	Ulsan	0.0385937	0.0849384	-0.127886	0.205073	0.454373	0.649894
264	PM-10	3	Kyunggi	0.0156213	0.0335083	-0.0500549	0.0812975	0.466192	0.641421
265	PM-10	3	Gangwon	0.0675581	0.0909543	-0.110712	0.245829	0.74277	0.45821
266	PM-10	3	Chungbuk	0.0814479	0.0998171	-0.114194	0.277089	0.815971	0.415173
267	PM-10	3	Chungnam	0.0306163	0.0837655	-0.133564	0.194797	0.3655	0.714999
268	PM-10	3	Jeonbuk	0.0351982	0.096107	-0.153172	0.223568	0.36624	0.714448
269	PM-10	3	Jeonnam	-0.0449278	0.0863864	-0.214245	0.12439	-0.52008	0.603397
270	PM-10	3	Gyungbuk	0.162158	0.0755998	0.0139822	0.310333	2.14495	0.0327705
271	PM-10	3	Gyungnam	-0.0379482	0.064392	-0.164157	0.0882602	-0.58933	0.556089
272	PM-10	3	Jeju	0.00105654	0.103706	-0.202207	0.20432	0.0101879	0.991878
273	NO2	3	Seoul	-268.724	127.889	-519.386	-18.0626	-2.10124	0.0364654
274	NO2	3	Busan	-20.885	326.475	-660.777	619.007	-0.0639712	0.949036
275	NO2	3	Daegu	255.028	275.382	-284.722	794.777	0.926085	0.355159
276	NO2	3	Incheon	305.804	258.382	-200.624	812.232	1.18354	0.237546
277	NO2	3	Gwangju	-150.359	366.527	-868.752	568.033	-0.410228	0.681936
278	NO2	3	Deajeon	-560.584	361.248	-1268.63	147.463	-1.5518	0.121779
279	NO2	3	Ulsan	380.568	449.632	-500.71	1261.85	0.8464	0.398014
280	NO2	3	Kyunggi	-207.006	132.571	-466.845	52.8323	-1.56148	0.119479
281	NO2	3	Gangwon	-189.737	612.606	-1390.44	1010.97	-0.309721	0.756991
282	NO2	3	Chungbuk	-507.651	469.428	-1427.73	412.427	-1.08143	0.280388
283	NO2	3	Chungnam	133.049	428.419	-706.653	972.751	0.310558	0.756355
284	NO2	3	Jeonbuk	117.145	646.783	-1150.55	1384.84	0.181119	0.856398
285	NO2	3	Jeonnam	-348.89	503.666	-1336.08	638.294	-0.692702	0.489039
286	NO2	3	Gyungbuk	-78.0493	417.798	-896.933	740.835	-0.186811	0.851937
287	NO2	3	Gyungnam	22.3357	356.254	-675.922	720.593	0.0626959	0.950051
288	NO2	3	Jeju	-457.764	740.834	-1909.8	994.27	-0.617904	0.537115
289	CO	3	Seoul	6.49822	7.78366	-8.75776	21.7542	0.834854	0.404473
290	CO	3	Busan	-14.7939	20.8337	-55.6279	26.0402	-0.710093	0.478205
291	CO	3	Daegu	2.84733	12.8435	-22.326	28.0206	0.221693	0.824706
292	CO	3	Incheon	-8.51062	15.1276	-38.1608	21.1395	-0.562588	0.574141
293	CO	3	Gwangju	-9.48194	12.7144	-34.4022	15.4384	-0.745761	0.456404
294	CO	3	Deajeon	5.07718	13.2793	-20.9502	31.1045	0.382339	0.702484
295	CO	3	Ulsan	-19.5953	19.4227	-57.6638	18.4731	-1.00889	0.313851
296	CO	3	Kyunggi	-2.75623	7.89289	-18.2263	12.7138	-0.349205	0.727184
297	CO	3	Gangwon	12.2628	16.7183	-20.5051	45.0308	0.733494	0.463838
298	CO	3	Chungbuk	13.6055	14.3407	-14.5022	41.7132	0.948738	0.343528
299	CO	3	Chungnam	9.14212	11.5469	-13.4898	31.7741	0.791736	0.429149
300	CO	3	Jeonbuk	-5.18992	19.4763	-43.3634	32.9836	-0.266473	0.79006
301	CO	3	Jeonnam	-0.0826441	17.9455	-35.2559	35.0906	-0.00460528	0.996329
302	CO	3	Gyungbuk	9.85052	13.2669	-16.1525	35.8536	0.74249	0.458379
303	CO	3	Gyungnam	4.82081	17.7341	-29.938	39.5796	0.271838	0.785936
304	CO	3	Jeju	-2.15405	27.1104	-55.2905	50.9824	-0.0794547	0.936725
305	SO2	3	Seoul	456.466	579.246	-678.857	1591.79	0.788034	0.431307
306	SO2	3	Busan	485.99	875.966	-1230.9	2202.88	0.554805	0.579447
307	SO2	3	Daegu	-21.6711	916.376	-1817.77	1774.43	-0.0236487	0.981149
308	SO2	3	Incheon	-723.031	952.432	-2589.8	1143.73	-0.759143	0.448371
309	SO2	3	Gwangju	1041.94	1337.85	-1580.25	3664.13	0.778818	0.436709
310	SO2	3	Deajeon	775.031	1412.51	-1993.49	3543.55	0.548691	0.583631
311	SO2	3	Ulsan	-646.811	875.224	-2362.25	1068.63	-0.739023	0.460479
312	SO2	3	Kyunggi	958.572	583.493	-185.074	2102.22	1.64282	0.101483
313	SO2	3	Gangwon	684.559	1146.97	-1563.51	2932.62	0.596841	0.55107
314	SO2	3	Chungbuk	-654.078	999.312	-2612.73	1304.57	-0.654528	0.51328
315	SO2	3	Chungnam	-114.909	1299.35	-2661.63	2431.81	-0.0884359	0.92959
316	SO2	3	Jeonbuk	1570.39	1652.93	-1669.36	4810.14	0.950061	0.342856
317	SO2	3	Jeonnam	1321.73	998.655	-635.632	3279.1	1.32351	0.186686
318	SO2	3	Gyungbuk	-1003.15	1004.5	-2971.97	965.659	-0.998664	0.318773
319	SO2	3	Gyungnam	1509.92	1023.28	-495.716	3515.55	1.47556	0.141124
320	SO2	3	Jeju	-1262.54	2069.78	-5319.31	2794.24	-0.609986	0.542341
321	Ozone	4	Seoul	7.91475	109.854	-207.399	223.229	0.0720479	0.942613
322	Ozone	4	Busan	257.528	161.446	-58.9057	573.961	1.59514	0.111753
323	Ozone	4	Daegu	-118.988	167.302	-446.9	208.923	-0.71122	0.477512
324	Ozone	4	Incheon	142.424	181.616	-213.543	498.391	0.784206	0.433548
325	Ozone	4	Gwangju	280.139	187.684	-87.7217	648	1.49261	0.136608
326	Ozone	4	Deajeon	-98.5654	217.721	-525.3	328.169	-0.452713	0.651088
327	Ozone	4	Ulsan	-284.47	268.879	-811.473	242.534	-1.05798	0.290929
328	Ozone	4	Kyunggi	132.008	111.643	-86.8127	350.829	1.18241	0.237995
329	Ozone	4	Gangwon	335.045	247.304	-149.672	819.761	1.35479	0.176522
330	Ozone	4	Chungbuk	508.899	234.027	50.206	967.591	2.17453	0.0304598
331	Ozone	4	Chungnam	472.199	215.798	49.2341	895.164	2.18815	0.029443
332	Ozone	4	Jeonbuk	267.07	249.992	-222.914	757.054	1.06831	0.286253
333	Ozone	4	Jeonnam	11.2957	179.208	-339.952	362.543	0.0630314	0.949784
334	Ozone	4	Gyungbuk	220.095	180.88	-134.431	574.62	1.2168	0.224654
335	Ozone	4	Gyungnam	365.603	162.809	46.498	684.708	2.2456	0.02547
336	Ozone	4	Jeju	319.371	226.415	-124.402	763.144	1.41056	0.159433
337	PM-10	4	Seoul	0.0486163	0.0357216	-0.0213981	0.118631	1.36098	0.17456
338	PM-10	4	Busan	0.0647968	0.0568864	-0.0467007	0.176294	1.13905	0.255604
339	PM-10	4	Daegu	0.0827561	0.0677808	-0.0500942	0.215606	1.22094	0.223088
340	PM-10	4	Incheon	0.0785899	0.0698702	-0.0583558	0.215536	1.1248	0.261589
341	PM-10	4	Gwangju	-0.0237514	0.0706053	-0.162138	0.114635	-0.336397	0.736811
342	PM-10	4	Deajeon	0.084251	0.0870226	-0.0863134	0.254815	0.96815	0.333763
343	PM-10	4	Ulsan	0.191303	0.084264	0.0261456	0.35646	2.27028	0.0239116
344	PM-10	4	Kyunggi	0.0291552	0.0336337	-0.0367668	0.0950772	0.866847	0.38673
345	PM-10	4	Gangwon	0.121628	0.090539	-0.0558286	0.299084	1.34337	0.180183
346	PM-10	4	Chungbuk	0.0834064	0.0981465	-0.108961	0.275774	0.849816	0.396117
347	PM-10	4	Chungnam	0.0956421	0.084042	-0.0690803	0.260364	1.13803	0.256033
348	PM-10	4	Jeonbuk	0.068502	0.0954643	-0.118608	0.255612	0.717567	0.473592
349	PM-10	4	Jeonnam	0.0966056	0.0866736	-0.0732746	0.266486	1.11459	0.265933
350	PM-10	4	Gyungbuk	0.0797588	0.0771295	-0.071415	0.230932	1.03409	0.301941
351	PM-10	4	Gyungnam	-0.00885648	0.0643546	-0.134991	0.117278	-0.13762	0.890635
352	PM-10	4	Jeju	-0.0654696	0.103266	-0.267871	0.136932	-0.633989	0.526581
353	NO2	4	Seoul	22.1085	128.244	-229.249	273.466	0.172394	0.863246
354	NO2	4	Busan	228.434	331.273	-420.861	877.729	0.689564	0.49101
355	NO2	4	Daegu	142.542	277.469	-401.298	686.381	0.513721	0.607833
356	NO2	4	Incheon	407.652	259.578	-101.121	916.424	1.57044	0.117384
357	NO2	4	Gwangju	301.084	376.025	-435.924	1038.09	0.800703	0.423948
358	NO2	4	Deajeon	-815.015	370.616	-1541.42	-88.6077	-2.19908	0.0286481
359	NO2	4	Ulsan	327.507	449.913	-554.322	1209.34	0.727934	0.467231
360	NO2	4	Kyunggi	-38.3645	133.752	-300.519	223.79	-0.286832	0.774442
361	NO2	4	Gangwon	-2.16928	619.042	-1215.49	1211.15	-0.00350426	0.997206
362	NO2	4	Chungbuk	199.239	470.313	-722.573	1121.05	0.423632	0.672143
363	NO2	4	Chungnam	-0.824183	430.896	-845.381	843.733	-0.00191272	0.998475
364	NO2	4	Jeonbuk	-453.601	652.778	-1733.05	825.844	-0.694878	0.487679
365	NO2	4	Jeonnam	-108.765	511.191	-1110.7	893.168	-0.212769	0.831654
366	NO2	4	Gyungbuk	394.106	428.064	-444.9	1233.11	0.920671	0.357974
367	NO2	4	Gyungnam	242.13	354.943	-453.559	937.819	0.682166	0.495669
368	NO2	4	Jeju	-493.963	729.483	-1923.75	935.824	-0.677141	0.498849
369	CO	4	Seoul	-7.71304	7.87597	-23.1499	7.72387	-0.979312	0.328228
370	CO	4	Busan	-24.5077	21.7377	-67.1135	18.0982	-1.12743	0.260478
371	CO	4	Daegu	-19.8118	12.5458	-44.4016	4.77794	-1.57916	0.115375
372	CO	4	Incheon	-21.8826	15.038	-51.357	7.59192	-1.45515	0.146691
373	CO	4	Gwangju	-16.1653	12.6738	-41.006	8.67538	-1.27549	0.20314
374	CO	4	Deajeon	-0.54309	13.0611	-26.1429	25.0567	-0.0415806	0.966861
375	CO	4	Ulsan	-35.9475	19.9689	-75.0866	3.19161	-1.80017	0.0728551
376	CO	4	Kyunggi	4.16022	7.87999	-11.2846	19.605	0.527947	0.597933
377	CO	4	Gangwon	0.583124	16.7239	-32.1956	33.3619	0.0348678	0.972209
378	CO	4	Chungbuk	-5.75068	14.1289	-33.4433	21.9419	-0.407016	0.684291
379	CO	4	Chungnam	-0.0639099	11.6076	-22.8148	22.687	-0.00550586	0.995611
380	CO	4	Jeonbuk	-10.9	19.1937	-48.5197	26.7198	-0.567892	0.57054
381	CO	4	Jeonnam	-7.12507	18.195	-42.7872	28.5371	-0.391596	0.69564
382	CO	4	Gyungbuk	-10.6322	13.4154	-36.9265	15.662	-0.792537	0.428685
383	CO	4	Gyungnam	17.991	17.6881	-16.6777	52.6597	1.01712	0.309928
384	CO	4	Jeju	30.6026	27.1226	-22.5578	83.7629	1.1283	0.260111
385	SO2	4	Seoul	1007.91	581.318	-131.472	2147.29	1.73384	0.0839914
386	SO2	4	Busan	-6.31549	903.679	-1777.53	1764.89	-0.00698864	0.994429
387	SO2	4	Daegu	671.586	912.735	-1117.37	2460.55	0.735795	0.462442
388	SO2	4	Incheon	224.554	950.442	-1638.31	2087.42	0.236263	0.813393
389	SO2	4	Gwangju	579.267	1326.37	-2020.41	3178.94	0.436733	0.662625
390	SO2	4	Deajeon	1473.2	1406.63	-1283.79	4230.19	1.04733	0.295804
391	SO2	4	Ulsan	-415.386	901.885	-2183.08	1352.31	-0.460575	0.645443
392	SO2	4	Kyunggi	-20.8676	586.153	-1169.73	1127.99	-0.035601	0.971625
393	SO2	4	Gangwon	1165.83	1135.79	-1060.31	3391.97	1.02645	0.305519
394	SO2	4	Chungbuk	592.458	982.584	-1333.41	2518.32	0.602959	0.546999
395	SO2	4	Chungnam	-731.451	1303.46	-3286.24	1823.34	-0.561159	0.575115
396	SO2	4	Jeonbuk	2668.39	1652.77	-571.051	5907.82	1.61449	0.10749
397	SO2	4	Jeonnam	-286.545	1003.11	-2252.65	1679.56	-0.285655	0.775343
398	SO2	4	Gyungbuk	-54.329	1020.27	-2054.05	1945.39	-0.0532499	0.957569
399	SO2	4	Gyungnam	369.881	1037.54	-1663.69	2403.46	0.356499	0.721722
400	SO2	4	Jeju	753.828	2069.85	-3303.09	4810.74	0.364194	0.715975
401	Ozone	5	Seoul	140.833	112.3	-79.2742	360.941	1.25408	0.210808
402	Ozone	5	Busan	221.625	156.26	-84.6442	527.893	1.41831	0.157159
403	Ozone	5	Daegu	223.236	167.184	-104.445	550.916	1.33527	0.182825
404	Ozone	5	Incheon	314.917	182.81	-43.3898	673.223	1.72265	0.0860033
405	Ozone	5	Gwangju	12.283	188.107	-356.407	380.973	0.065298	0.947981
406	Ozone	5	Deajeon	-129.231	220.376	-561.168	302.706	-0.586413	0.558048
407	Ozone	5	Ulsan	-7.02133	264.218	-524.888	510.845	-0.026574	0.978818
408	Ozone	5	Kyunggi	-28.1195	114.621	-252.777	196.538	-0.245325	0.806376
409	Ozone	5	Gangwon	296.803	254.163	-201.358	794.963	1.16776	0.243848
410	Ozone	5	Chungbuk	142.928	243.863	-335.045	620.9	0.586097	0.55826
411	Ozone	5	Chungnam	248.613	217.091	-176.885	674.111	1.1452	0.253057
412	Ozone	5	Jeonbuk	95.706	250.482	-395.24	586.651	0.382087	0.702673
413	Ozone	5	Jeonnam	113.458	175.981	-231.464	458.38	0.644721	0.519611
414	Ozone	5	Gyungbuk	310.678	181.499	-45.0596	666.416	1.71174	0.0879999
415	Ozone	5	Gyungnam	76.7114	160.872	-238.598	392.021	0.476847	0.633825
416	Ozone	5	Jeju	70.1749	223.563	-368.009	508.359	0.313893	0.753826
417	PM-10	5	Seoul	0.00426151	0.035622	-0.0655576	0.0740806	0.119632	0.904857
418	PM-10	5	Busan	0.0322891	0.0570848	-0.0795972	0.144175	0.565633	0.572074
419	PM-10	5	Daegu	-0.0618539	0.0676171	-0.194383	0.0706757	-0.914766	0.361067
420	PM-10	5	Incheon	0.0227421	0.0697081	-0.113886	0.15937	0.326247	0.74447
421	PM-10	5	Gwangju	-0.0588772	0.070515	-0.197087	0.0793321	-0.834961	0.404418
422	PM-10	5	Deajeon	0.060749	0.0866404	-0.109066	0.230564	0.701163	0.483756
423	PM-10	5	Ulsan	-0.051253	0.0849546	-0.217764	0.115258	-0.603299	0.546775
424	PM-10	5	Kyunggi	-0.00696558	0.0339355	-0.0734791	0.059548	-0.20526	0.837511
425	PM-10	5	Gangwon	0.0348596	0.0919479	-0.145358	0.215078	0.379124	0.70487
426	PM-10	5	Chungbuk	-0.066875	0.0996981	-0.262283	0.128533	-0.670775	0.50289
427	PM-10	5	Chungnam	-0.0213047	0.0847969	-0.187507	0.144897	-0.251244	0.801801
428	PM-10	5	Jeonbuk	0.0486382	0.0960074	-0.139536	0.236813	0.506609	0.612809
429	PM-10	5	Jeonnam	-0.0902827	0.0865828	-0.259985	0.0794197	-1.04273	0.297929
430	PM-10	5	Gyungbuk	-0.14279	0.0772315	-0.294164	0.0085839	-1.84885	0.0654826
431	PM-10	5	Gyungnam	-0.0706882	0.0646408	-0.197384	0.0560079	-1.09355	0.275047
432	PM-10	5	Jeju	0.00733604	0.104277	-0.197047	0.211719	0.0703515	0.943962
433	NO2	5	Seoul	-287.726	128.152	-538.903	-36.5481	-2.24519	0.0254988
434	NO2	5	Busan	35.5593	337.655	-626.245	697.364	0.105313	0.9162
435	NO2	5	Daegu	-118.086	275.159	-657.397	421.225	-0.429156	0.668125
436	NO2	5	Incheon	119.433	262.736	-395.53	634.396	0.454573	0.649752
437	NO2	5	Gwangju	671.088	375.017	-63.9458	1406.12	1.78949	0.0745658
438	NO2	5	Deajeon	-190.504	379.926	-935.158	554.151	-0.501424	0.616448
439	NO2	5	Ulsan	1158.95	452.112	272.811	2045.09	2.56341	0.0108623
440	NO2	5	Kyunggi	105.246	135.757	-160.838	371.33	0.775251	0.438814
441	NO2	5	Gangwon	-25.1829	637.618	-1274.91	1224.55	-0.0394953	0.968522
442	NO2	5	Chungbuk	372.157	475.428	-559.681	1304	0.782784	0.434384
443	NO2	5	Chungnam	540.087	435.68	-313.846	1394.02	1.23964	0.216097
444	NO2	5	Jeonbuk	-326.463	653.871	-1608.05	955.124	-0.499278	0.617957
445	NO2	5	Jeonnam	481.024	516.716	-531.739	1493.79	0.930925	0.352656
446	NO2	5	Gyungbuk	140.927	433.409	-708.555	990.409	0.325159	0.745292
447	NO2	5	Gyungnam	-318.708	357.158	-1018.74	381.321	-0.892346	0.372937
448	NO2	5	Jeju	-526.737	726.476	-1950.63	897.156	-0.725058	0.468995
449	CO	5	Seoul	2.9879	7.94076	-12.576	18.5518	0.376273	0.706985
450	CO	5	Busan	-2.79222	22.2837	-46.4683	40.8838	-0.125303	0.900369
451	CO	5	Daegu	-18.2966	12.9117	-43.6034	7.01026	-1.41706	0.157528
452	CO	5	Incheon	14.3477	15.1806	-15.4063	44.1017	0.945135	0.345366
453	CO	5	Gwangju	-12.1523	13.0462	-37.723	13.4183	-0.931481	0.352369
454	CO	5	Deajeon	13.645	12.908	-11.6547	38.9448	1.05709	0.291336
455	CO	5	Ulsan	-15.4452	20.5602	-55.7433	24.8528	-0.751219	0.453122
456	CO	5	Kyunggi	-0.105564	7.98588	-15.7579	15.5468	-0.0132189	0.989462
457	CO	5	Gangwon	1.63067	16.9579	-31.6069	34.8682	0.09616	0.923459
458	CO	5	Chungbuk	-16.5	14.5527	-45.0234	12.0234	-1.13381	0.257799
459	CO	5	Chungnam	11.9461	11.7222	-11.0294	34.9217	1.0191	0.308993
460	CO	5	Jeonbuk	13.6603	19.3053	-24.178	51.4986	0.707594	0.479758
461	CO	5	Jeonnam	3.72272	18.3033	-32.1517	39.5971	0.203391	0.83897
462	CO	5	Gyungbuk	4.16152	13.4709	-22.2415	30.5645	0.308926	0.757597
463	CO	5	Gyungnam	-20.2104	17.6074	-54.7209	14.3002	-1.14783	0.25197
464	CO	5	Jeju	2.42094	27.3389	-51.1633	56.0052	0.0885528	0.929498
465	SO2	5	Seoul	1217.73	587.059	67.0909	2368.36	2.07428	0.0389231
466	SO2	5	Busan	-413.69	907.021	-2191.45	1364.07	-0.456098	0.648656
467	SO2	5	Daegu	1484.23	921.699	-322.297	3290.76	1.61032	0.108404
468	SO2	5	Incheon	-850.978	953.385	-2719.61	1017.66	-0.892586	0.372809
469	SO2	5	Gwangju	-1201.04	1357.38	-3861.49	1459.42	-0.884823	0.376975
470	SO2	5	Deajeon	908.352	1406.98	-1849.34	3666.04	0.645602	0.519041
471	SO2	5	Ulsan	-1585.23	892.452	-3334.44	163.973	-1.77627	0.0767231
472	SO2	5	Kyunggi	243.204	592.05	-917.214	1403.62	0.410784	0.681531
473	SO2	5	Gangwon	879.958	1162.01	-1397.57	3157.49	0.757276	0.449491
474	SO2	5	Chungbuk	1300.88	1008.33	-675.44	3277.21	1.29014	0.198016
475	SO2	5	Chungnam	-1112.67	1330.07	-3719.62	1494.27	-0.836552	0.403524
476	SO2	5	Jeonbuk	1955.24	1702.12	-1380.93	5291.4	1.14871	0.251611
477	SO2	5	Jeonnam	814.252	1008.36	-1162.13	2790.63	0.807503	0.42003
478	SO2	5	Gyungbuk	-468.085	1028.23	-2483.42	1547.25	-0.455233	0.649278
479	SO2	5	Gyungnam	2037.81	1052.47	-25.039	4100.66	1.93621	0.0538003
480	SO2	5	Jeju	1892.49	2073.64	-2171.84	5956.83	0.912643	0.362181
481	Ozone	6	Seoul	33.568	116.192	-194.169	261.305	0.2889	0.772862
482	Ozone	6	Busan	407.067	149.945	113.175	700.959	2.71478	0.00702539
483	Ozone	6	Daegu	-244.848	174.444	-586.757	97.0616	-1.40359	0.161502
484	Ozone	6	Incheon	140.021	186.818	-226.142	506.184	0.749506	0.454153
485	Ozone	6	Gwangju	-42.9985	188.237	-411.943	325.946	-0.228427	0.819473
486	Ozone	6	Deajeon	68.5325	224.592	-371.668	508.733	0.305142	0.760474
487	Ozone	6	Ulsan	-143.011	258.318	-649.315	363.292	-0.553625	0.580258
488	Ozone	6	Kyunggi	4.39655	116.154	-223.265	232.058	0.0378511	0.969832
489	Ozone	6	Gangwon	228.858	258.3	-277.409	735.126	0.886019	0.376334
490	Ozone	6	Chungbuk	512.39	244.158	33.8398	990.94	2.0986	0.0367082
491	Ozone	6	Chungnam	523.231	217.424	97.0807	949.381	2.40651	0.0167249
492	Ozone	6	Jeonbuk	11.3583	251.888	-482.343	505.06	0.0450928	0.964064
493	Ozone	6	Jeonnam	-53.3305	173.903	-394.18	287.519	-0.306669	0.759313
494	Ozone	6	Gyungbuk	-18.2013	183.337	-377.541	341.139	-0.0992778	0.920986
495	Ozone	6	Gyungnam	147.126	159.738	-165.96	460.211	0.921048	0.357783
496	Ozone	6	Jeju	238.436	217.149	-187.177	664.049	1.09803	0.273098
497	PM-10	6	Seoul	-0.0361104	0.0356453	-0.105975	0.0337545	-1.01305	0.311874
498	PM-10	6	Busan	0.00853231	0.0562096	-0.101638	0.118703	0.151794	0.879453
499	PM-10	6	Daegu	0.0459976	0.0680139	-0.0873096	0.179305	0.676297	0.499387
500	PM-10	6	Incheon	-0.0369482	0.0699739	-0.174097	0.100201	-0.528028	0.59788
501	PM-10	6	Gwangju	0.125918	0.0703165	-0.0119027	0.263738	1.79073	0.0743695
502	PM-10	6	Deajeon	-0.0527794	0.0869092	-0.223121	0.117563	-0.607294	0.544126
503	PM-10	6	Ulsan	0.0754919	0.0842864	-0.0897095	0.240693	0.895659	0.37117
504	PM-10	6	Kyunggi	-0.0295566	0.0337483	-0.0957032	0.0365901	-0.875794	0.38186
505	PM-10	6	Gangwon	0.0195262	0.0922779	-0.161339	0.200391	0.211602	0.832565
506	PM-10	6	Chungbuk	0.0989015	0.0978222	-0.0928301	0.290633	1.01103	0.312835
507	PM-10	6	Chungnam	-0.0742773	0.0842126	-0.239334	0.0907794	-0.882021	0.378488
508	PM-10	6	Jeonbuk	0.0859745	0.0961126	-0.102406	0.274355	0.894518	0.371779
509	PM-10	6	Jeonnam	0.0907447	0.0868831	-0.0795461	0.261035	1.04445	0.29714
510	PM-10	6	Gyungbuk	0.0381501	0.077589	-0.113924	0.190225	0.491694	0.623304
511	PM-10	6	Gyungnam	-0.0149305	0.0654299	-0.143173	0.113312	-0.22819	0.819657
512	PM-10	6	Jeju	-0.0551716	0.103879	-0.258774	0.148431	-0.531116	0.595742
513	NO2	6	Seoul	-154.938	130.177	-410.084	100.208	-1.19021	0.234926
514	NO2	6	Busan	-897.603	333.711	-1551.68	-243.53	-2.68976	0.00756028
515	NO2	6	Daegu	66.4453	281.535	-485.363	618.253	0.236011	0.81359
516	NO2	6	Incheon	-8.06242	267.879	-533.105	516.98	-0.0300973	0.97601
517	NO2	6	Gwangju	-107.2	370.94	-834.243	619.843	-0.288995	0.772789
518	NO2	6	Deajeon	-394.462	386.853	-1152.69	363.769	-1.01967	0.308726
519	NO2	6	Ulsan	363.714	453.028	-524.22	1251.65	0.802852	0.422711
520	NO2	6	Kyunggi	-1.65719	136.548	-269.291	265.977	-0.0121363	0.990325
521	NO2	6	Gangwon	-83.2649	632.802	-1323.56	1157.03	-0.131581	0.895406
522	NO2	6	Chungbuk	225.542	460.995	-678.009	1129.09	0.48925	0.625031
523	NO2	6	Chungnam	252.421	428.659	-587.752	1092.59	0.588861	0.556408
524	NO2	6	Jeonbuk	-295.906	645.303	-1560.7	968.889	-0.458553	0.646895
525	NO2	6	Jeonnam	-580.196	519.424	-1598.27	437.876	-1.117	0.264911
526	NO2	6	Gyungbuk	302.893	438.296	-556.168	1161.95	0.691068	0.49007
527	NO2	6	Gyungnam	-120.051	360.348	-826.333	586.231	-0.333153	0.739257
528	NO2	6	Jeju	-319.16	722.798	-1735.85	1097.53	-0.441562	0.659133
529	CO	6	Seoul	10.5202	7.89908	-4.962	26.0024	1.33183	0.183953
530	CO	6	Busan	40.1097	21.8436	-2.70373	82.9231	1.83622	0.0673377
531	CO	6	Daegu	-4.79242	12.9374	-30.1496	20.5648	-0.370433	0.711328
532	CO	6	Incheon	3.27696	15.3491	-26.8073	33.3612	0.213495	0.831089
533	CO	6	Gwangju	-19.0925	13.0092	-44.5907	6.40556	-1.46761	0.143282
534	CO	6	Deajeon	11.8485	12.7895	-13.219	36.916	0.926421	0.35499
535	CO	6	Ulsan	-9.11529	20.4313	-49.1606	30.93	-0.446144	0.655822
536	CO	6	Kyunggi	-4.8099	7.89657	-20.2872	10.6674	-0.609113	0.542921
537	CO	6	Gangwon	3.0161	16.3444	-29.019	35.0512	0.184534	0.853722
538	CO	6	Chungbuk	-22.3203	14.2311	-50.2133	5.57268	-1.56842	0.117863
539	CO	6	Chungnam	2.56201	11.923	-20.807	25.931	0.21488	0.83001
540	CO	6	Jeonbuk	23.7937	19.5229	-14.4712	62.0585	1.21876	0.223916
541	CO	6	Jeonnam	14.6535	18.4733	-21.5541	50.8611	0.793227	0.428287
542	CO	6	Gyungbuk	-0.17323	13.4402	-26.516	26.1695	-0.0128889	0.989725
543	CO	6	Gyungnam	-11.84	17.9124	-46.9484	23.2683	-0.660995	0.509135
544	CO	6	Jeju	-30.712	27.1175	-83.8623	22.4382	-1.13255	0.25833
545	SO2	6	Seoul	23.9089	597.941	-1148.06	1195.87	0.0399854	0.968132
546	SO2	6	Busan	467.168	911.029	-1318.45	2252.78	0.512792	0.608483
547	SO2	6	Daegu	584.399	920.417	-1219.62	2388.42	0.634929	0.525972
548	SO2	6	Incheon	-110.964	970.557	-2013.26	1791.33	-0.114331	0.909054
549	SO2	6	Gwangju	1299.93	1371.49	-1388.2	3988.07	0.947823	0.344001
550	SO2	6	Deajeon	752.806	1424.09	-2038.4	3544.01	0.528624	0.597466
551	SO2	6	Ulsan	-2327.71	894.481	-4080.9	-574.53	-2.6023	0.00973082
552	SO2	6	Kyunggi	935.797	597.135	-234.587	2106.18	1.56715	0.11816
553	SO2	6	Gangwon	948.716	1150.69	-1306.64	3204.07	0.824475	0.41034
554	SO2	6	Chungbuk	1682.19	989.675	-257.576	3621.95	1.69974	0.0902417
555	SO2	6	Chungnam	23.0742	1376.5	-2674.86	2721.01	0.016763	0.986637
556	SO2	6	Jeonbuk	-886.732	1730.61	-4278.73	2505.27	-0.51238	0.608771
557	SO2	6	Jeonnam	-1107.05	1024.66	-3115.4	901.291	-1.0804	0.280851
558	SO2	6	Gyungbuk	-656.062	1029.26	-2673.41	1361.29	-0.637412	0.524354
559	SO2	6	Gyungnam	1601.92	1092.12	-538.63	3742.47	1.4668	0.143502
560	SO2	6	Jeju	322.47	2066.82	-3728.5	4373.45	0.156022	0.876123
Abbreviations: S.E., Standard Error; SD, Standard Deviation; CI, Confidence Interval; PM-10, Particulate Matter (particulates with size of 10 µm in diameter or smaller).
